# Supplementary material for: Facile synthesis of NiS2nanoparticles ingrained in a sulfur-doped carbon nitride framework with enhanced visible light photocatalytic activity: two functional roles of thiourea
Source: Royal Society of Chemistry journal article supplement (doi:10.1039/c8ta03068e), 2018-01-01
Supplement: c8ta03068e1.pdf [file c8ta03068e1.pdf]

## Supporting Information

# **Facile synthesis of NiS<sub>2</sub> nanoparticles ingrained in sulfur-doped carbon nitride framework with enhanced visible light photocatalytic activity: Two functional roles of thiourea**

**Milad Jourshabani,<sup>a,b</sup> Zahra Shariatinia,<sup>\*a</sup> Gopal Achari,<sup>b</sup>**

**Cooper H. Langford<sup>c</sup> and Alireza Badiei<sup>d</sup>**

---

<sup>a</sup>Department of Chemistry, Amirkabir University of Technology (Tehran Polytechnic), P.O.Box:15875-4413, Tehran, Iran. \*E-mail: shariati@aut.ac.ir.

<sup>b</sup>Department of Civil Engineering, University of Calgary, 2500 University Drive NW, Calgary, AB, Canada.

<sup>c</sup>Department of Chemistry, University of Calgary, 2500 University Drive NW, Calgary, AB, Canada.

<sup>d</sup>School of Chemistry, College of Science, University of Tehran, Tehran, Iran.

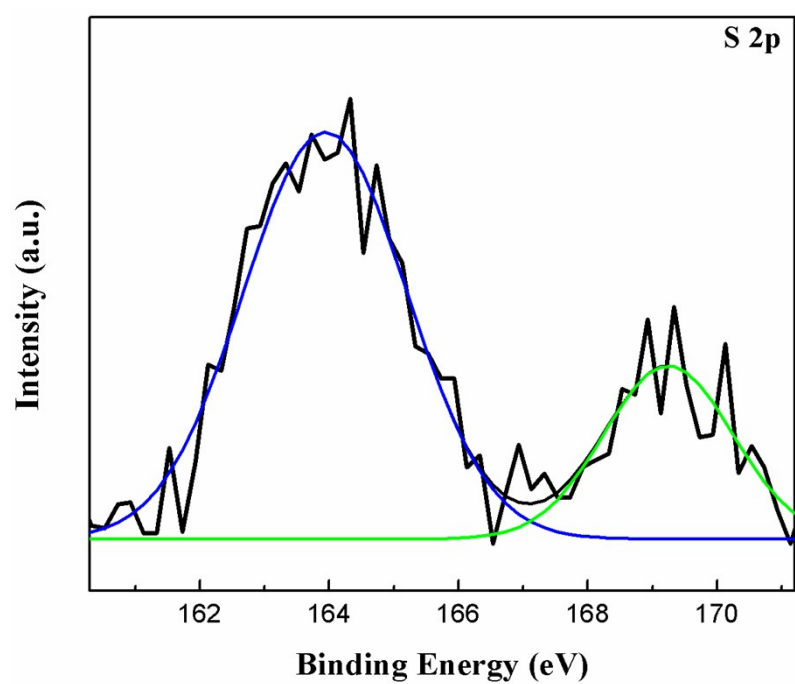

**Fig. S1** The high-resolution XPS spectrum in the S 2p region for the NiS<sub>2</sub>(5.9)/CNS nanocomposite.

| Compound | ESP | Contour map |
|----------|-----|-------------|
| 1        |     |             |
| 2        |     |             |
| 3        |     |             |
| 4        |     |             |

**Fig. S2** The electrostatic surface potentials (ESPs) and contour maps for the pure carbon nitride (CN, **1**) and its three S-doped CN (**2-4**) compounds computed at B3LYP/6-31G(d,p) level of theory in water.

Red and yellow colors represent negative and positive regions of the wave functions, respectively.

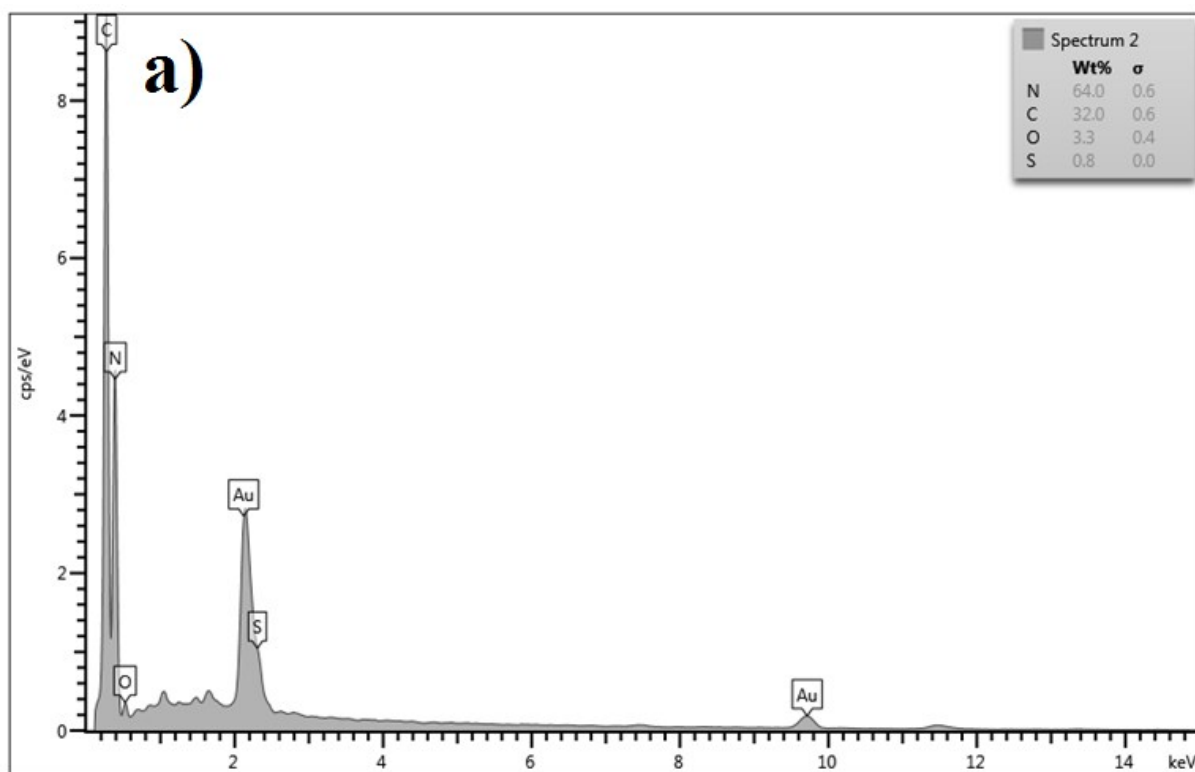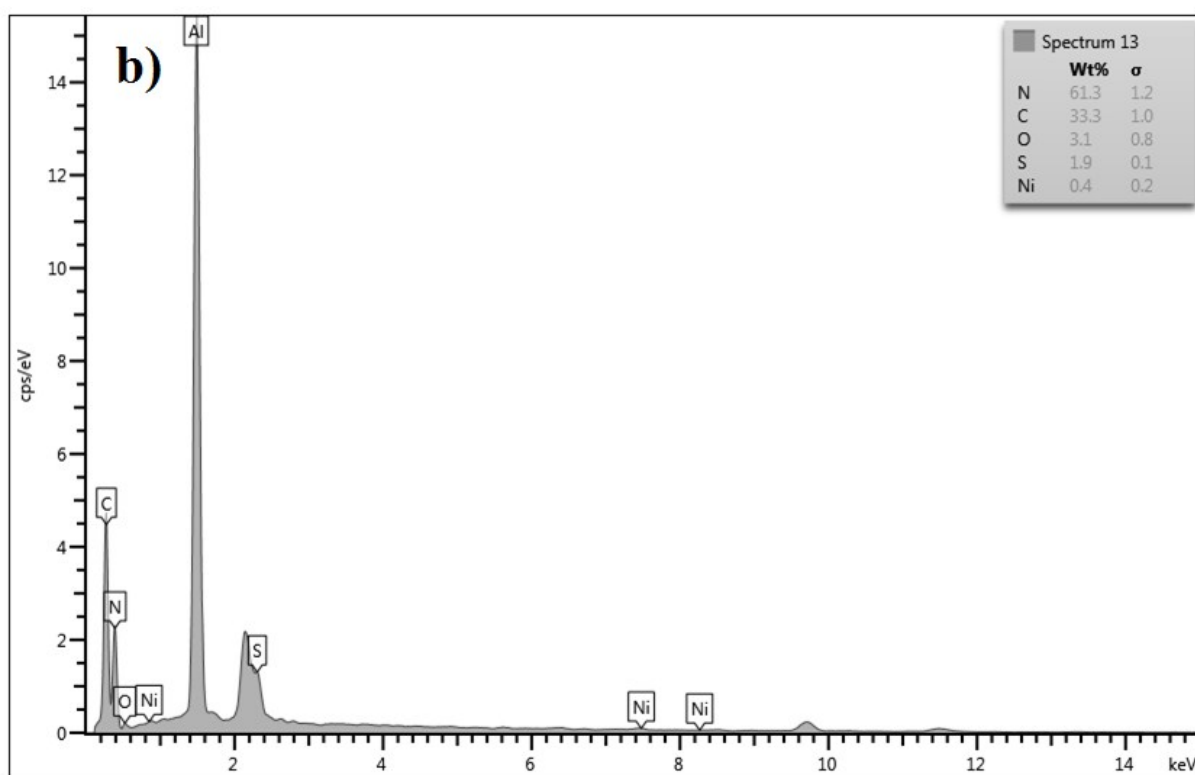

**Fig. S3** The EDX plots for the (a) CNS and (b)  $\text{NiS}_2(5.9)/\text{CNS}$  samples.

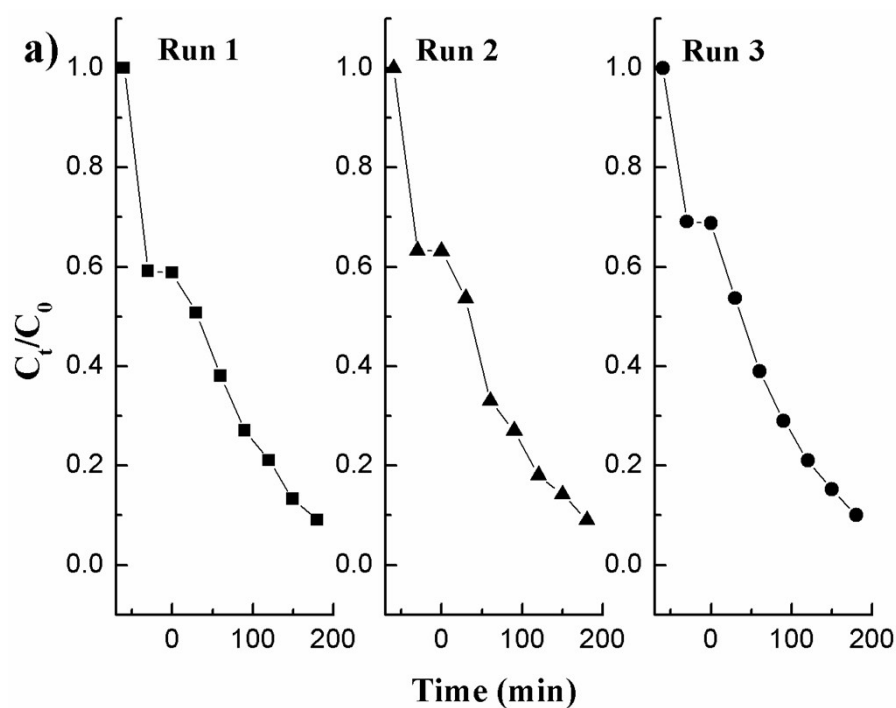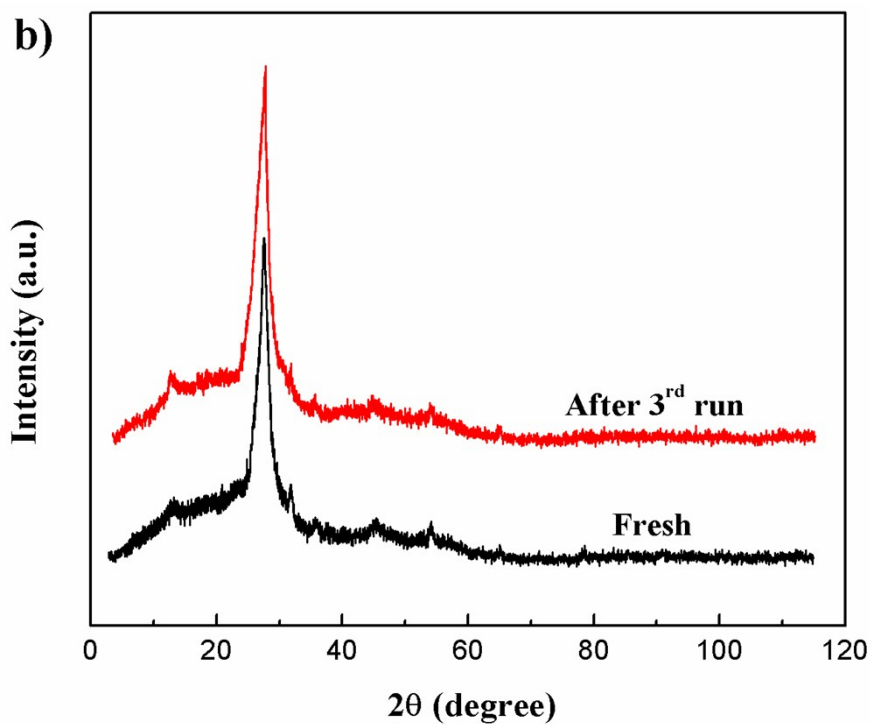

**Fig. S4** (a) Recyclability of the  $\text{NiS}_2(5.9)/\text{CNS}$  photocatalyst used in three experiments for the photocatalytic degradation of RhB under visible light irradiation and (b) the XRD patterns for the  $\text{NiS}_2(5.9)/\text{CNS}$  sample before and after the cycling photocatalytic experiments.

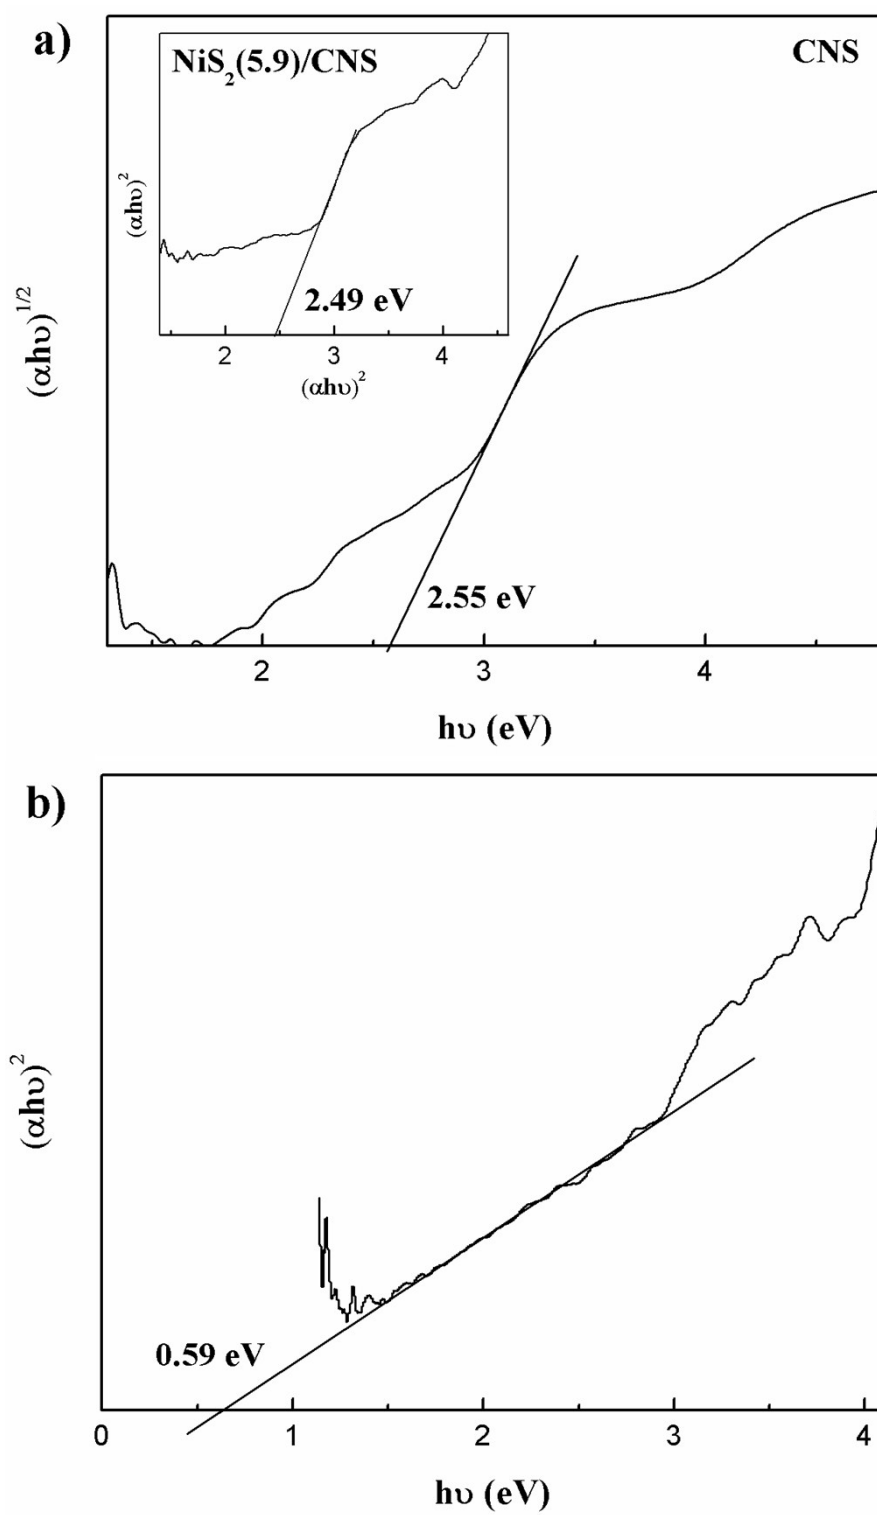

**Fig. S5** The Tauc plots for (a) CNS and NiS<sub>2</sub>(5.9)/CNS and (b) NiS<sub>2</sub> samples.

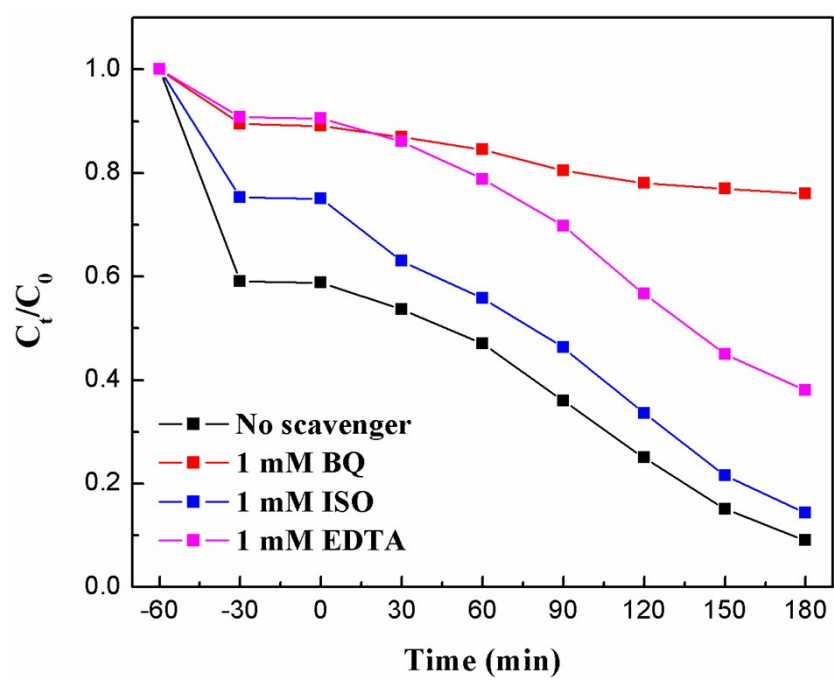

**Fig. S6** Influence of various trapping agents on the RhB catalytic degradation in presence of the NiS<sub>2</sub>(5.9)/CNS composite photocatalyst.
